# Supplementary material
Source: publisher site journal article supplement (https://www.dovepress.com/get_supplementary_file.php?f=362362.docx)
Supplement: Supplementary file 1 [file get_supplementary_file.php]

**Supplementary Materials**

Normal gastrointestinal mucosa at biopsy and overall mortality: Nationwide population-based cohort study

Jonas F. Ludvigsson, Jiangwei Sun, Ola Olén, Mingyang Song, Jonas Halfvarsson, Bjorn Roelstraete, Hamed Khalili, Fang Fang

**Contents**

**Supplementary Table 1.** The Swedish-version International Classification of Diseases (ICD) codes for cause-specific mortality

**Supplementary Table 2.** Definitions of endoscopy, colectomy, and proctocolectomy

**Supplementary Table 3.** Mortality in individuals with a GI biopsy result of normal mucosa and their matched references, follow-up time: 0-5 y

**Supplementary Table 4.** Mortality in individuals with a GI biopsy result of normal mucosa and their matched references, follow-up time: >5 y

**Supplementary Table 5.** Characteristics of individuals with a GI biopsy result of normal mucosa and their siblings, a nationwide matched cohort study in Sweden, 1965-2016

**Supplementary Table 6.** A selection of guidelines and studies on prognosis of a number of GI diseases

**Supplementary Figure 1.** Subgroup analyses of the temporal pattern of the risk of all-cause mortality

**Supplementary Figure 2.** Subgroup analyses of normal mucosa with risk of all-cause mortality among those underwent upper or lower GI biopsy

**Supplementary Figure 3**. Sensitivity analyses of the associations between normal mucosa and risk of mortality

| Supplementary Table 1. The Swedish-version International Classification of Diseases (ICD) codes for cause-specific mortality | | | | |
| --- | --- | --- | --- | --- |
| Cause-specific mortality | ICD-7 (1964-1968) | ICD-8 (1969-1986) | ICD-9 (1987-1996) | ICD-10 (1997-) |
| Cardiovascular disease | 400-468 | 391-458 | 391-459 | I00-I99 |
| Cancer | 140-209 | 140-209 | 140-209 | C00-C99 |
| Gastrointestinal disease | 530-587 | 520-579 | 520-579 | K00-K99 |
| Other | Remaining | Remaining | Remaining | Remaining |

| Supplementary Table 2. Definitions of endoscopy, colectomy, and proctocolectomy | | |
| --- | --- | --- |
|  |  |  |
| Endoscopy | Esophagogastroduodenoscopy | 2861, 2880, 2881, 4480, 4483, 4486, 4487, 4488, 4489, 4490, 9021, 4686, 4687, 9003, 9004, 9021, UJC, UJD, UJF02, UJF05 |
| Colonoscopy or sigmoidoscopy | 9011, 9012, 9023, 4685, 4688, 4689, 4674, 4684, UJF32, UJF35, UJF42, UJF45 |
| Colectomy | Sixth revision | 4650, 4651 |
| Seventh revision | JFH10, JFH11, JFH96, JFH00, JFH01, JFC40, JFC41, JFG29, JFG26 |
| Proctocolectomy | Sixth revision | 4652, 4653, 4654 |
| Seventh revision | JFH30, JFH33, JGB50, JGB60, JFH40, JFH20 |

| Supplementary Table 3. Mortality in individuals with a GI biopsy result of normal mucosa and their matched references, follow-up time: 0-5 y | | | | | | | | | | |
| --- | --- | --- | --- | --- | --- | --- | --- | --- | --- | --- |
|  | No. of events | |  | Incidence rate (95% CIs), per 10,000 Pys | |  | Incidence rate difference (95% CIs), per 10,000 Pys |  | HR (95% CIs) | |
| Events | Normal mucosa | References |  | Normal mucosa | References |  |  | Model 1 | Model 2 |
| All-cause mortality | 32869 | 108740 |  | 156.12 (154.45-157.80) | 102.47 (101.86-103.07) |  | 53.65 (51.87-55.43) |  | 1.63 (1.61-1.65) | 1.34 (1.32-1.36) |
| CVD mortality | 9966 | 44689 |  | 47.33 (46.41-48.27) | 42.11 (41.72-42.50) |  | 5.22 (4.22-6.23) |  | 1.22 (1.19-1.25) | 1.01 (0.99-1.04) |
| Cancer mortality | 12928 | 27868 |  | 61.40 (60.35-62.47) | 26.26 (25.95-26.57) |  | 35.14 (34.04-36.24) |  | 2.48 (2.43-2.53) | 2.21 (2.16-2.26) |
| GI disease mortality | 1776 | 3321 |  | 8.44 (8.05-8.84) | 3.13 (3.02-3.24) |  | 5.31 (4.90-5.71) |  | 2.87 (2.71-3.04) | 1.93 (1.82-2.05) |
| Other mortality | 8199 | 32862 |  | 38.94 (38.11-39.79) | 30.97 (30.63-31.30) |  | 7.98 (7.07-8.88) |  | 1.33 (1.30-1.36) | 1.05 (1.03-1.08) |
| CIs, confidence intervals; CVD, cardiovascular disease; GI, gastrointestinal; HR, hazard ratio | | | | | | | | | | |
| Model 1: conditioned on family and adjusted for birth year, gender, and calendar period | | | | | | | | | | |
| Model 2: Further adjusted for country of birth, educational attainment, number of healthcare visits, Charlson comorbidity index, and history of GI diseases | | | | | | | | | | |

| Supplementary Table 4. Mortality in individuals with a GI biopsy result of normal mucosa and their matched references, follow-up time: >5 y | | | | | | | | | | |
| --- | --- | --- | --- | --- | --- | --- | --- | --- | --- | --- |
|  | No. of events | |  | Incidence rate (95% CIs), per 10,000 Pys | |  | Incidence rate difference (95% CIs), per 10,000 Pys |  | HR (95% CIs) | |
| Events | Normal mucosa | References |  | Normal mucosa | References |  |  | Model 1 | Model 2 |
| All-cause mortality | 52990 | 268913 |  | 142.71 (141.51-143.93) | 142.17 (141.63-142.70) |  | 0.55 (-0.77-1.87) |  | 1.14 (1.12-1.15) | 1.03 (1.02-1.05) |
| CVD mortality | 18639 | 101084 |  | 50.20 (49.48-50.92) | 53.44 (53.11-53.77) |  | -3.24 (-4.03--2.45) |  | 1.09 (1.07-1.11) | 0.99 (0.97-1.01) |
| Cancer mortality | 11432 | 61269 |  | 30.79 (30.23-31.36) | 32.39 (32.14-32.65) |  | -1.60 (-2.22--0.98) |  | 1.05 (1.03-1.08) | 1.00 (0.98-1.02) |
| GI disease mortality | 2043 | 7801 |  | 5.50 (5.27-5.75) | 4.12 (4.03-4.22) |  | 1.38 (1.12-1.63) |  | 1.55 (1.47-1.64) | 1.29 (1.22-1.37) |
| Other mortality | 20876 | 98759 |  | 56.22 (55.47-56.99) | 52.21 (51.89-52.54) |  | 4.01 (3.19-4.84) |  | 1.21 (1.19-1.23) | 1.08 (1.06-1.10) |
| CIs, confidence intervals; CVD, cardiovascular disease; GI, gastrointestinal; HR, hazard ratio | | | | | | | | | | |
| Model 1: conditioned on family and adjusted for birth year, gender, and calendar period | | | | | | | | | | |
| Model 2: Further adjusted for country of birth, educational attainment, number of healthcare visits, Charlson comorbidity index, and history of GI diseases | | | | | | | | | | |

| Supplementary Table 5. Characteristics of individuals with a gastrointestinal (GI) biopsy result of normal mucosa and their siblings, a nationwide matched cohort study in Sweden, 1965-2016 | | |
| --- | --- | --- |
|  | No. (%) | |
| Characteristics | Normal mucosa (n=273,681) | Reference (n=505,076) |
| Age at cohort entry, years a |  |  |
| Mean ± SD | 37.90 ± 17.36 | 39.27 ± 17.48 |
| Median (IQR) | 37.13 (23.95-51.30) | 39.48 (25.44-52.86) |
| <18 y | 30590 (11.18) | 61679 (12.21) |
| 18-<40 y | 119943 (43.83) | 195567 (38.72) |
| 40-<60 y | 89902 (32.85) | 180257 (35.69) |
| ≥60 y | 33246 (12.15) | 67573 (13.38) |
| Gender |  |  |
| Male | 104448 (38.16) | 256593 (50.80) |
| Female | 169233 (61.84) | 248483 (49.20) |
| Country of birth |  |  |
| Nordic country | 267073 (97.59) | 489147 (96.85) |
| Other country | 6608 (2.41) | 15929 (3.15) |
| Biopsy location b |  |  |
| Upper GI | 162715 (59.45) | 301918 (59.78) |
| Lower GI | 110966 (40.55) | 203158 (40.22) |
| Start year of follow-up |  |  |
| 1969-1989 | 18518 (6.77) | 38704 (7.66) |
| 1990-1999 | 64163 (23.44) | 123912 (24.53) |
| 2000-2009 | 108657 (39.70) | 197757 (39.15) |
| 2010-2016 | 82343 (30.09) | 144703 (28.65) |
| Educational attainment |  |  |
| 0-9 y | 48588 (17.75) | 102794 (20.35) |
| 10-12 y | 111584 (40.77) | 200939 (39.78) |
| ≥13 y | 74171 (27.10) | 117693 (23.30) |
| Missing | 39338 (14.37) | 83650 (16.56) |
| Number of healthcare visit |  |  |
| 0 | 170416 (62.27) | 365856 (72.44) |
| 1 | 42341 (15.47) | 64568 (12.78) |
| 2-3 | 32643 (11.93) | 43421 (8.60) |
| ≥4 | 28281 (10.33) | 31231 (6.18) |
| Charlson comorbidity index |  |  |
| 0 | 221790 (81.04) | 437517 (86.62) |
| 1 | 41062 (15.00) | 54938 (10.88) |
| ≥2 | 10829 (3.96) | 12621 (2.50) |
| History before start of follow-up |  |  |
| GI disease | 127274 (46.50) | 105666 (20.92) |
| Endoscopy | 90507 (33.07) | 27167 (5.38) |
| GI cancer | 707 (0.26) | 1938 (0.38) |
| Colectomy or protocolectomy | 200 (0.07) | 699 (0.14) |
| Follow-up years, Median (IQR) | 11.73 (6.20-18.77) | 12.24 (6.64-19.35) |
| <5 y | 51994 (19.00) | 87158 (17.26) |
| 5-<10 y | 65219 (23.83) | 117674 (23.30) |
| 10-<25 y | 129750 (47.41) | 244675 (48.44) |
| ≥25 y | 26718 (9.76) | 55569 (11.00) |
| No. of event |  |  |
| All-cause mortality | 18881 (6.90) | 32139 (6.36) |
| CVD mortality | 3519 (1.29) | 7519 (1.49) |
| Cancer mortality | 7037 (2.57) | 10846 (2.15) |
| GI disease mortality | 1003 (0.37) | 1155 (0.23) |
| Other mortality | 7322 (2.68) | 12619 (2.50) |
| IQR, interquartile range; SD, standard deviation | | |
| a Cohort entry: date of first biopsy record for individuals with a gastrointestinal biopsy result of normal mucosa, and date of selection for their siblings | | |
| b Siblings were assigned a value of biopsy location based on the exposed sibling | | |

| **Supplementary Table 6: A selection of guidelines and studies on prognosis of a number of GI diseases** | | | |
| --- | --- | --- | --- |
| ***Disease*** | ***Recommended follow-up*** | ***Mortality*** | ***Other prognosis/comorbidity*** |
|  |  |  |  |
| Gastritis | Treat Helicobacter pylori, examine B12 levels, and endoscopic surveillance every 3 yrs. | Standardized mortality ratio=1.28 (personal communication, Weimin Ye, 2021) | HR for gastric cancer=2.6 compared with normal mucosa |
| Celiac disease | Follow-up of clinical symptoms and celiac serology | HR=1.21 | HR for CRC=1.1 (non-significant) beyond the first year of follow-up) |
| Diverticulosis/diverticulitis | Follow-up colonoscopy after 4-6 weeks and then surveillance similar to IBD | No available data on relative risks but 8.7% 30-day-mortality after hospital admission for diverticulitis | No association between diverticulosis and CRC (odds ratio=0.98) |
| Colorectal polyps | Small hyperplastic polyps<10 mm: new examination in 10 yrs  3-10 adenomas: new examination in 3 yrs | No available data on relative risks | Hyperplastic polyps: Risk of CRC: HR=1.12 |
| CRC | New examination 1 year after CRC surgery | Highly varying data, but 5-year-mortality in Sweden is 40%. | - |
| Inflammatory bowel disease (IBD) | CRC screening after 8 yrs with IBD or presence of primary sclerosing cholangitis. | Adulthood IBD, HR = 1.5 | HR for CRC=1.6 in ulcerative colitis (and similar in Crohn’s disease) |
| Microscopic colitis | New colonoscopy on deterioration or suspected complications | HR=1.17 | HR for CRC=0.52 (i.e. a lower risk) |
| Normal mucosa (no guidelines) | Adults *without polyps* often re-screened every 10yrs. | No published data | HR 0.62 for CRC incidence and 0.56 for mortality of incident CRC |


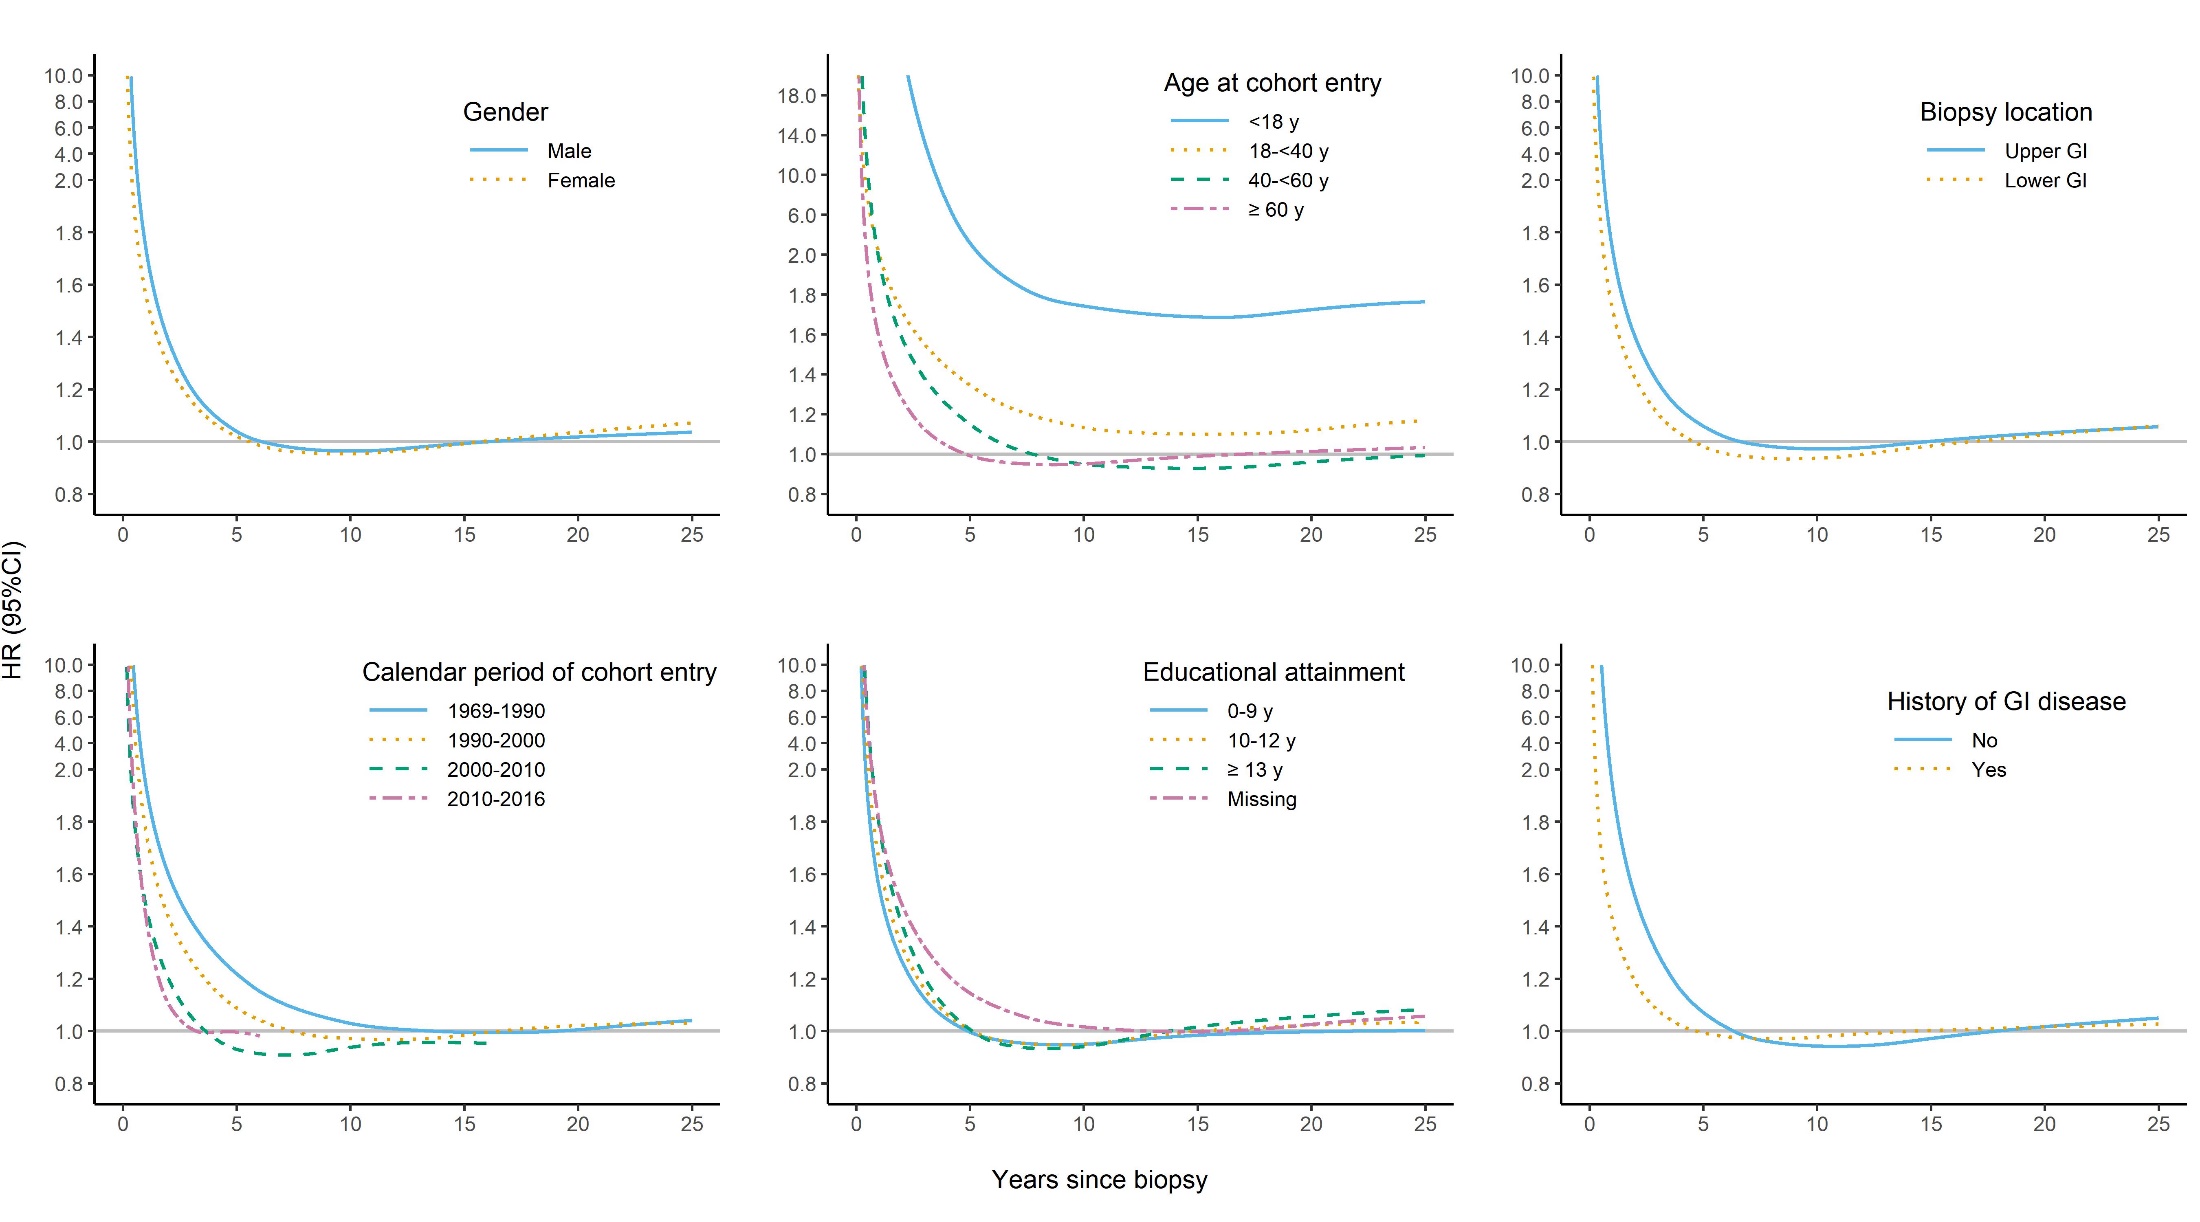


**Supplementary Figure 1.** Subgroup analyses of the temporal pattern of the risk of all-cause mortality, estimated by the flexible parametric model that conditioned on matching set (birth year, gender, county of residence, and calendar period) and further adjusted for country of birth, educational attainment, number of healthcare visits, Charlson comorbidity index, and history of GI diseases.

**
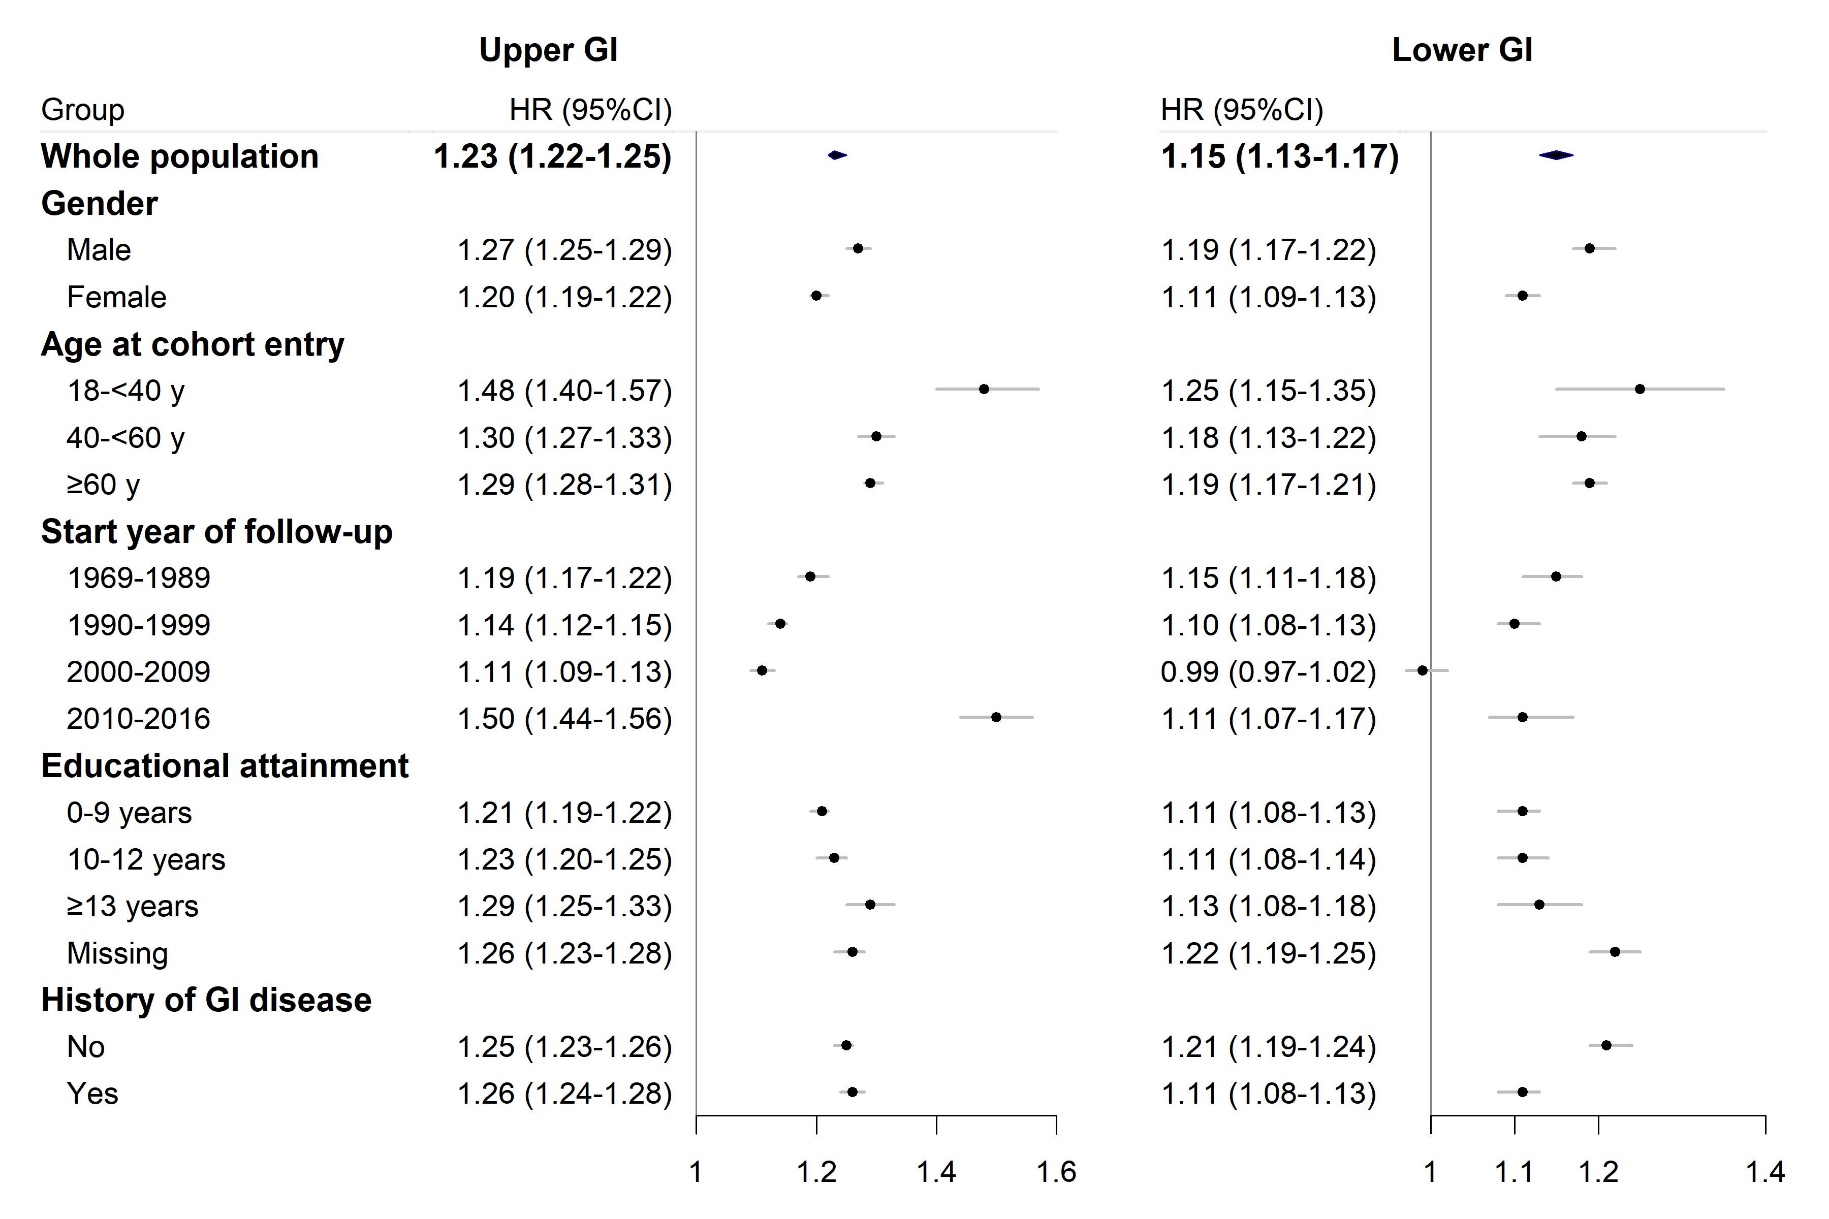
**

**Supplementary Figure 2.** Subgroup analyses of normal mucosa with risk of all-cause mortality among those underwent upper or lower GI biopsy. Individuals with an upper GI biopsy in childhood (age at cohort entry <18 years) demonstrated a higher risk for all-cause mortality (HR=2.47; 95%CI: 2.10-2.90), as well as individuals with a lower GI biopsy in childhood (HR=2.23; 95%CI: 1.85-2.69). Estimated by the flexible parametric model that conditioned on matching set (birth year, gender, county of residence, and calendar period) and further adjusted for country of birth, educational attainment, number of healthcare visits, Charlson comorbidity index, and history of GI diseases.


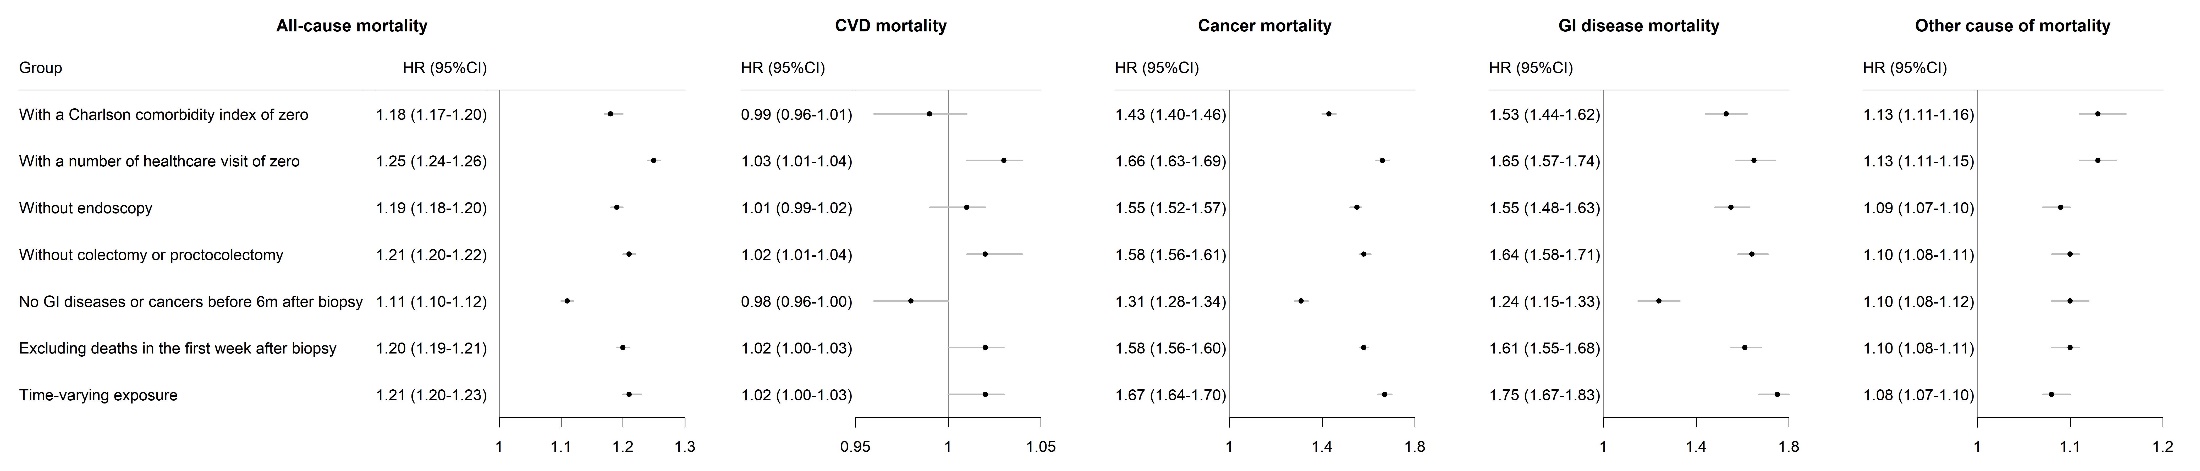


**Supplementary Figure 3.** Sensitivity analyses of the associations between normal mucosa and risk of mortality. Estimated by the flexible parametric model that conditioned on matching set (birth year, gender, county of residence, and calendar period) and further adjusted for country of birth, educational attainment, number of healthcare visits, Charlson comorbidity index, and history of GI diseases.
